# Supplementary material for: Water, Sanitation, and Hygiene Facilities and Hygiene Practices Associated with Diarrhea and Vomiting in Monastic Schools, Myanmar
Source: PubMed Central journal article supplement (PMC4973172; doi:10.4269/ajtmh.15-0290), 2016-08-03
Supplement: SD1.pdf [file SD1.pdf]

SUPPLEMENTAL TABLE 1

Adjusted random effect multinomial regression models for self-reported diarrhoea and vomiting among students and risk factors in Monastic schools in Myanmar using student-to-facility ratios to measure toilet and handwash station availability ( $N = 1, 659$ )

| Factor                                    | Diarrhea only ( $N = 204$ ) |                  | Vomiting only ( $N = 200$ ) |                  | Diarrhea and vomiting ( $N = 179$ ) |                  |
|-------------------------------------------|-----------------------------|------------------|-----------------------------|------------------|-------------------------------------|------------------|
|                                           | ARR (95% CI)                | <i>P</i> value   | ARR (95% CI)                | <i>P</i> value   | ARR (95% CI)                        | <i>P</i> value   |
| <b>Student level</b>                      |                             |                  |                             |                  |                                     |                  |
| <b>Student characteristics</b>            |                             |                  |                             |                  |                                     |                  |
| <b>Sex</b>                                |                             |                  |                             |                  |                                     |                  |
| Male                                      | 1.18 (0.86–1.62)            | 0.30             | 1.06 (0.77–1.46)            | 0.73             | 1.05 (0.75–1.48)                    | 0.77             |
| Female                                    | Ref.                        |                  | Ref.                        |                  | Ref.                                |                  |
| <b>Grade</b>                              |                             |                  |                             |                  |                                     |                  |
| 4                                         | <b>1.46 (1.07–2.00)</b>     | <b>0.02</b>      | <b>2.13 (1.54–2.94)</b>     | <b>&lt; 0.01</b> | <b>1.58 (1.13–2.21)</b>             | <b>0.01</b>      |
| 5                                         | <b>Ref.</b>                 |                  | <b>Ref.</b>                 |                  | <b>Ref.</b>                         |                  |
| <b>Hygiene behavior</b>                   |                             |                  |                             |                  |                                     |                  |
| <b>Poor handwashing before meals</b>      |                             |                  |                             |                  |                                     |                  |
| Yes                                       | 1.01 (0.66–1.57)            | 0.95             | 1.06 (0.69–1.62)            | <b>0.80</b>      | 1.34 (0.87–2.08)                    | 0.185            |
| No                                        | Ref.                        |                  | Ref.                        |                  | Ref.                                |                  |
| <b>Poor handwashing after toilet use</b>  |                             |                  |                             |                  |                                     |                  |
| Yes                                       | 1.01 (0.65–1.56)            | 0.98             | 1.24 (0.81–1.89)            | 0.32             | 1.03 (0.66–1.61)                    | 0.91             |
| No                                        | Ref.                        |                  | Ref.                        |                  | Ref.                                |                  |
| <b>Inconsistent toilet use</b>            |                             |                  |                             |                  |                                     |                  |
| Yes                                       | 1.07 (0.76–1.52)            | 0.70             | 1.34 (0.94–1.91)            | 0.11             | 1.37 (0.95–1.99)                    | 0.09             |
| No                                        | Ref.                        |                  | Ref.                        |                  | Ref.                                |                  |
| <b>Poor hygiene education recall</b>      |                             |                  |                             |                  |                                     |                  |
| Yes                                       | 0.91 (0.56–1.50)            | 0.72             | 0.96 (0.59–1.56)            | 0.88             | 1.17 (0.72–1.91)                    | 0.52             |
| No                                        | Ref.                        |                  | Ref.                        |                  | Ref.                                |                  |
| <b>School level</b>                       |                             |                  |                             |                  |                                     |                  |
| <b>Student-to-toilet ratio*</b>           |                             |                  |                             |                  |                                     |                  |
| < 51:1                                    | Ref.                        |                  | Ref.                        |                  | Ref.                                |                  |
| 51:1–100:1                                | <b>0.45 (0.26–0.78)</b>     | <b>&lt; 0.01</b> | 0.70 (0.40–1.20)            | 0.20             | <b>0.49 (0.27–0.89)</b>             | <b>0.02</b>      |
| > 100:1                                   | <b>0.48 (0.24–0.97)</b>     | <b>0.04</b>      | 0.70 (0.35–1.40)            | 0.32             | 1.07 (0.52–2.18)                    | 0.86             |
| <b>Type of toilet</b>                     |                             |                  |                             |                  |                                     |                  |
| <b>Pour flush</b>                         |                             |                  |                             |                  |                                     |                  |
| Yes                                       | 0.71 (0.42–1.20)            | 0.20             | 0.87 (0.51–1.48)            | 0.61             | 0.74 (0.43–1.29)                    | 0.29             |
| No                                        | Ref.                        |                  | Ref.                        |                  | Ref.                                |                  |
| <b>Latrine</b>                            |                             |                  |                             |                  |                                     |                  |
| Yes                                       | 0.90 (0.54–1.49)            | 0.68             | 1.16 (0.70–1.92)            | 0.56             | 1.29 (0.76–2.19)                    | 0.35             |
| No                                        | Ref.                        |                  | Ref.                        |                  | Ref.                                |                  |
| <b>Septic tank</b>                        |                             |                  |                             |                  |                                     |                  |
| Yes                                       | <b>0.59 (0.37–0.95)</b>     | <b>0.03</b>      | 0.69 (0.43–1.19)            | 0.14             | <b>0.58 (0.35–0.95)</b>             | <b>0.03</b>      |
| No                                        | <b>Ref.</b>                 |                  | Ref.                        |                  | <b>Ref.</b>                         |                  |
| <b>Unclean toilets</b>                    |                             |                  |                             |                  |                                     |                  |
| Yes                                       | 0.72 (0.43–1.20)            | 0.72             | 0.82 (0.49–1.36)            | 0.44             | 0.60 (0.35–1.01)                    | 0.05             |
| No                                        | Ref.                        |                  | Ref.                        |                  | Ref.                                |                  |
| <b>No separate toilets for girls</b>      |                             |                  |                             |                  |                                     |                  |
| Yes                                       | 0.86 (0.51–1.45)            | 0.57             | 1.22 (0.72–2.05)            | 0.46             | <b>0.45 (0.25–0.80)</b>             | <b>&lt; 0.01</b> |
| No                                        | Ref.                        |                  | Ref.                        |                  | <b>Ref.</b>                         |                  |
| <b>Handwashing facilities</b>             |                             |                  |                             |                  |                                     |                  |
| <b>Student-to-handwash station ratio†</b> |                             |                  |                             |                  |                                     |                  |
| < 51:1                                    | Ref.                        |                  | Ref.                        |                  | Ref.                                |                  |
| 51:1–150:1                                | 0.86 (0.48–1.53)            | 0.61             | 1.16 (0.65–2.06)            | 0.62             | 0.83 (0.46–1.50)                    | 0.54             |
| > 151:1                                   | 1.96 (1.02–3.75)            | 0.04             | 1.71 (0.89–3.30)            | 0.11             | 1.61 (0.81–3.18)                    | 0.17             |
| <b>Insufficient soap available</b>        |                             |                  |                             |                  |                                     |                  |
| Yes                                       | 0.78 (0.48–1.27)            | 0.32             | 0.93 (0.57–1.52)            | 0.76             | 0.76 (0.46–1.26)                    | 0.28             |
| No                                        | Ref.                        |                  | Ref.                        |                  | Ref.                                |                  |
| <b>Insufficient water available</b>       |                             |                  |                             |                  |                                     |                  |
| Yes                                       | 0.48 (0.15–1.50)            | 0.21             | 0.41 (0.13–1.34)            | 0.14             | 2.47 (0.91–6.65)                    | 0.08             |
| No                                        | Ref.                        |                  | Ref.                        |                  | Ref.                                |                  |

ARR = adjusted relative risk ratio; CI = confidence interval.

\*Student-to-toilet ratio = number of students at the school to the number of student toilets at the school.

†Student-to-handwash station ratio = number of students at the school to the number of handwash stations for students at the school.
